# Supplementary material
Source: Research Square preprint supplement (doi:10.21203/rs.3.rs-9230758/v1)
Supplement: Supplementary file 1 [file 78eb1275b7dc0e96bb29dacd.docx]

**Appendix 1. Search Strategy**

| **Database** | **Search strategy** |
| --- | --- |
| **PubMed** | ("disaster medicine" OR "disaster preparedness" OR "mass casualty incident" OR "emergency preparedness" OR "Mass Casualty Incidents"[MeSH] OR "Disaster Medicine"[MeSH] OR "Disaster Planning"[MeSH]) AND ("curriculum design" OR "instructional design" OR "educational strategies" OR "Curriculum"[MeSH] OR "Education"[MeSH] OR "Simulation Training"[MeSH] OR "Teaching"[MeSH]) AND ("first responders" OR intern* OR "healthcare provider" OR "Paramedics"[MeSH] OR "Health Personnel"[MeSH] OR "Nurses"[MeSH] OR "Physicians"[MeSH]) AND (y_10[Filter]) |
| **Scopus** | ( TITLE-ABS-KEY ( "disaster medicine" OR "disaster preparedness" OR "mass casualty incident" OR "emergency preparedness" ) AND TITLE-ABS-KEY ( "curriculum design" OR "instructional design" OR "educational strategies" OR "simulation training" OR education* OR teaching OR training ) AND TITLE-ABS-KEY ( paramedic* OR "first responders" OR "medical student" OR physician* OR intern* OR nurse* OR "healthcare provider" ) ) AND PUBYEAR > 2014 AND PUBYEAR < 2026 AND ( EXCLUDE ( DOCTYPE , "re" ) ) AND ( EXCLUDE ( LANGUAGE , "Chinese" ) OR EXCLUDE ( LANGUAGE , "German" ) OR EXCLUDE ( LANGUAGE , "Russian" ) ) |
| **Embase** | #22 #21 AND (2015:py OR 2016:py OR 2017:py OR 2018:py OR 2019:py OR                  2020:py OR 2021:py OR 2022:py OR 2023:py OR 2024:py OR 2025:py)  #21 #8 AND #14 AND #20  #20 #15 OR #16 OR #17 OR #18 OR #19  #19 'emergency preparedness'  #18 'mass casualty incident'  #17 'mass disaster'  #16 'disaster preparedness'  #15 'disaster medicine'  #14 #9 OR #10 OR #11 OR #12 OR #13  #13 'teaching'  #12 'educational model'  #11 'curriculum development'  #10 'education program'  #9 'simulation training'  #8 #1 OR #2 OR #3 OR #4 OR #5 OR #6 OR #7  #7 'health care personnel'  #6 'nurse'  #5 'medical intern'  #4 'physician'  #3 'medical student'  #2 'first responder (person)'  #1 'paramedical personnel' |
| PsycNET | ((Any Field: (paramedic*) OR Any Field: ("first responders") OR Any Field: ("medical student") OR Any Field: (physician*) OR Any Field: (intern*) OR Any Field: (nurse*) OR Any Field: ("healthcare provider"))) AND ((Any Field: ("curriculum design") OR Any Field: ("instructional design") OR Any Field: ("educational strategies") OR Any Field: ("simulation training") OR Any Field: (education*) OR Any Field: (teaching) OR Any Field: (training))) AND ((Any Field: ("disaster medicine") OR Any Field: ("disaster preparedness") OR Any Field: ("mass casualty incident") OR Any Field: ("emergency preparedness"))) AND Year: 2015 To 2025 |
| **CINAHL** | (paramedic* OR "first responders" OR "medical student" OR physician* OR intern* OR nurse* OR "healthcare provider" ) AND ("curriculum design" OR "instructional design" OR "educational strategies" OR "simulation training" OR education* OR teaching OR training ) AND ("disaster medicine" OR "disaster preparedness" OR "mass casualty incident" OR "emergency preparedness")  Filter: last 10 years |
| **Cochrane** | (paramedic* OR "first responders" OR "medical student" OR physician* OR intern* OR nurse* OR "healthcare provider") in Title Abstract Keyword AND ("curriculum design" OR "instructional design" OR "educational strategies" OR "simulation training" OR education* OR teaching OR training) in Title Abstract Keyword AND ("disaster medicine" OR "disaster preparedness" OR "mass casualty incident" OR "emergency preparedness") in Title Abstract Keyword  Filter: last 10 years |
| **ClinicalTrials.gov** | (paramedic* OR "first responders" OR "medical student" OR physician* OR intern* OR nurse* OR "healthcare provider" ) AND ("curriculum design" OR "instructional design" OR "educational strategies" OR "simulation training" OR education* OR teaching OR training ) AND ("disaster medicine" OR "disaster preparedness" OR "mass casualty incident" OR "emergency preparedness") |
