# Supplementary material
Source: Research Square preprint supplement (doi:10.21203/rs.3.rs-9230758/v1)
Supplement: Supplementary file 2 [file 8b4959af35231fc24388916a.docx]

**Appendix 3. Characteristics of Educational Setting and Competency Focus by Study**

| **Study ID** | Educational Setting | Competencies targeted |
| --- | --- | --- |
| **Montana 2019** | Elective module within an undergraduate degree program | **Systems & Command:** Hospital disaster preparedness, mass-casualty management, mobilization procedures, and institutional roles in disaster medicine.  **Clinical & Triage:** CBRN/HazMat recognition and management, decontamination, self-protection, emergency trauma care, life-saving procedures, toxicology competencies (hazard identification, exposure assessment, acute poisoning management).  **Public Health & Preparedness:** Disaster medicine terminology, legal frameworks, pharmaceutical logistics, military supply chains, antidote production. |
| **Levoy 2018** | Undergraduate degree-based (Bachelor’s) course component | **Systems & Command:** ICS/NIMS roles and structures; disaster definitions, phases, and national response frameworks; hospital incident management.  **Clinical & Triage:** Disaster triage, injury pattern recognition, CBRN/bioterrorism agent identification and management, PPE protocols.  **Public Health & Preparedness:** Mass prophylaxis/POD operations; sheltering and community care; vulnerable population considerations; infectious hazard transmission and treatment.  **Teamwork & Leadership:** Interprofessional collaboration with emergency management, public health, EMS, fire, and police; volunteer coordination via Medical Reserve Corps.  **Psychosocial & Ethics:** Nursing roles, legal/ethical accountability, psychological considerations in response. |
| **Chumvanichaya 2025** | Undergraduate degree-based (Bachelor’s) course component | **Clinical & Triage:** Disaster triage competencies using SIEVE, SORT, and START algorithms. |
| **Mohammadinia 2022** | Undergraduate degree-based (Bachelor’s) course component | **Systems & Command:** Disaster/emergency management concepts and earthquake-focused response scenarios.  **Public Health & Preparedness:** Disaster preparedness readiness using earthquake-focused scenario; attitudinal preparedness toward disasters; applied preparedness skills through practice maneuvers. |
| **Bajow 2015** | Education model proposal | **Systems & Command:** Incident command; hospital disaster preparedness; disaster and MCI management.  **Clinical & Triage:** Triage decision-making; trauma and emergency care.  **Public Health & Preparedness:** General disaster medicine concepts (terminology, classification, trigger events); disaster risk reduction and regional hazard identification; community awareness and public health education.  **Teamwork & Leadership:** Interprofessional collaboration.  **Psychosocial & Ethics:** Psychological first aid; PPE protocols. |
| **Koziel 2015** | Stand-alone training | **Systems & Command:** Incident command system (ICS) concepts; MCI operational judgment and transition to multi-victim resource-scarce triage.  **Clinical & Triage:** Pediatric triage accuracy and prioritization; pediatric physiology and vital-sign assessment; special-needs triage for children with complex healthcare needs; emotional control in distressing scenarios. |
| **Shinchi 2019** | Education model proposal | **Systems & Command:** Disaster nursing operations planning including team roles, safety, security, and situational assessment; information and logistics planning for supplies and equipment.  **Clinical & Triage:** Infection prevention and control during deployments.  **Teamwork & Leadership:** Communication across cultures and with multidisciplinary teams; international disaster response coordination.  **Psychosocial & Ethics:** Professional attitude, cultural sensitivity, ethical/legal nursing standards. |
| **Wright 2025** | Graduate medical education (Fellowship-based training) | **Systems & Command:** MCI activation decision-making, ED MCI plan activation, incident command planning; resource awareness and rapid access to PPE/decontamination supplies; team-based multidisciplinary response.  **Clinical & Triage:** SALT and JumpSTART triage application; crisis standards of care framing (‘greatest good for greatest number’).  **Teamwork & Leadership:** Multidisciplinary coordination across ED and emergency management roles. |
| **Tsai 2020** | Undergraduate degree-based (Bachelor’s) course component | **Systems & Command:** NIMS/ICS concepts, MCI protocols, patient flow; hospital incident management.  **Clinical & Triage:** Triage training and MCI drills; CBRN topics, PPE, and decontamination; TCCC (Care Under Fire, Tactical Field Care, Tactical Evacuation Care); evacuation in special circumstances.  **Public Health & Preparedness:** Surge/logistics content; disaster prevention.  **Psychosocial & Ethics:** Mental health, PTSD, self-harm/suicide prevention, legal/ethical considerations in disaster response. |
| **Kim 2020** | Undergraduate degree-based (Bachelor’s) course component | **Systems & Command:** Incident command system (ICS) concepts; MCI protocols and patient flow.  **Clinical & Triage:** MCI triage decision-making accuracy (prioritization, avoiding under/over-triage); basic first-aid and immediate care; resource utilization and patient transfer under time pressure.  **Teamwork & Leadership:** Team-based response with role clarity, leadership, coordination, and shared situational awareness; communication.  **Psychosocial & Ethics:** Ethical issue identification; safety competence for self and others; response readiness and confidence. |
| **Xia 2019** | Stand-alone training | **Systems & Command:** Disaster fundamentals including hospital incident command system (HICS); disaster definitions, characteristics, and management continuum.  **Clinical & Triage:** START triage principles (mobility, vital signs, mental status) for color-coded prioritization.  **Public Health & Preparedness:** Family disaster planning (escape routes, meeting points, contact cards, 3-day kit); personal safety during events; preparedness for vulnerable family members.  **Psychosocial & Ethics:** Preparedness attitude/readiness, willingness to train, confidence in triage and family planning. |
| **Kivlehan 2021** | Graduate medical education (Residency-based training) | **Systems & Command:** EMS system coordination (dispatch, communication, handover to ED); prehospital field management and scene basics.  **Clinical & Triage:** Patient triage in disaster/MCI context; practical prehospital care exposure through ride-alongs.  **Teamwork & Leadership:** Medical direction, protocol development, leadership/training of prehospital staff. |
| **Eastwood 2023** | Stand-alone training | **Systems & Command:** ICS basics, activation/huddles, resource-aware thinking, ED surge flow (scene → transport → disposition); hospital incident management.  **Clinical & Triage:** START triage with rapid decisions and immediate life-saving actions; trauma-style primary assessment (ATLS), hemorrhage control, chest interventions, IV access, splinting.  **Teamwork & Leadership:** ICS-linked role assignment, SBAR communication, brief/debrief, multi-team MCI coordination. |
| **Hung 2021** | Undergraduate degree-based (Bachelor’s) course component | **Systems & Command:** Incident command system (ICS) concepts; disaster management across prevention, preparedness, response, and recovery.  **Clinical & Triage:** START triage; life support and trauma care; physical first aid.  **Psychosocial & Ethics:** Professional readiness and confidence; psychological first aid. |
| **Hwang 2021** | Undergraduate degree-based (Bachelor’s) course component | **Systems & Command:** System activation and incident command system (ICS) concepts; role task assignments.  **Clinical & Triage:** Patient triage in disaster/MCI contexts; triage/isolation/PPE management in infectious-disease surge; decontamination and PPE protocols.  **Public Health & Preparedness:** Disaster preparedness and education; community/home-care assessment and follow-up/rehabilitation support; isolation guidance and monitoring; personal/family care planning in outbreaks.  **Teamwork & Leadership:** Communication and information sharing (handover, education, misinformation correction).  **Psychosocial & Ethics:** Ethical/legal practice; psychological assessment/support; vulnerable population considerations. |
| **Hsieh 2023** | Hospital-based in-service training | **Systems & Command:** Incident command system (ICS) concepts; hospital fire-safety procedures and roles.  **Clinical & Triage:** Patient triage in disaster/MCI context; fire response (RACE protocol); evacuation prioritization and safe handling of different patient types (ambulatory, bedbound, oxygen/ventilator dependent).  **Public Health & Preparedness:** Fire prevention and hazard reduction (electrical/combustible controls); compliance with hospital safety procedures. |
| **Baser 2025** | Undergraduate degree-based (Bachelor’s) course component | **Systems & Command:** Disaster systems coordination and teamwork; incident command.  **Clinical & Triage:** Prioritize trauma/emergency care; emergency surgical procedures; triage basics.  **Public Health & Preparedness:** Mitigation through hazard identification and risk reduction; preparedness planning and role knowledge; relief/recovery coordination.  **Teamwork & Leadership:** Decision-making and information-based action selection. |
| **Cole 2021** | Stand-alone training | **Clinical & Triage:** Patient triage in disaster/MCI context.  **Teamwork & Leadership:** Interdisciplinary teamwork with shared discipline-specific information and co-produced response plans; clear communication, listening, and task coordination; team reliability, follow-through, and collaborative attitude under pressure. |
| **Park 2024** | Stand-alone training | **Systems & Command:** Incident command system (ICS) concepts; disaster response principles and limited-resource management.  **Clinical & Triage:** Rapid multi-victim assessment and prioritization; vulnerable group and pediatric triage; immediate care delivery.  **Public Health & Preparedness:** Disaster management principles application; preparedness and critical thinking.  **Psychosocial & Ethics:** Psychological first aid delivery. |
| **Donahue 2022** | Graduate medical education (Residency-based training) | **Systems & Command:** Incident command system (ICS) concepts; disaster cycle (mitigation, preparedness, response, recovery).  **Clinical & Triage:** JumpSTART pediatric triage; treatment of multiple critically ill children; disposition decisions under limited resources.  **Public Health & Preparedness:** Understanding pediatric vulnerabilities across the disaster cycle; family disaster plan development.  **Teamwork & Leadership:** Effective teamwork across triage/treatment zones; caregiver guidance and debrief-based improvement. |
| **Djalali 2017** | Stand-alone training | **Systems & Command:** Hospital incident command activation; coordination with EMS and external agencies; command and planning; communication and backup systems.  **Clinical & Triage:** CBRN hazard identification and health effects; PPE use, decontamination, triage, diagnosis, and treatment of CBRN casualties; resource management and surge capacity.  **Psychosocial & Ethics:** Psychological first aid; risk communication to public/media; ethical standards in crisis settings. |
| **Chilton 2017** | Undergraduate degree-based (Bachelor’s) course component | **Public Health & Preparedness:** Personal 72-hour emergency kit assembly; evacuation and shelter-in-place planning; hazard and alert awareness; community preparedness counseling (assessing vulnerable clients’ risks and tailoring practical plans); federal/state/local preparedness resources and nursing organizational guidance. |
| **Varanelli 2019** | Undergraduate degree-based (Bachelor’s) course component | **Clinical & Triage:** Patient triage in disaster/MCI context; scene safety assessment; identification of life-threatening bleeding; hemorrhage control via direct pressure, wound packing, and correct tourniquet application (including contraindicated sites: neck, chest, abdomen, groin); resourcefulness with improvised supplies; effective pressure maintenance until handoff.  **Teamwork & Leadership:** Calling and activating emergency response. |
| **Martin-Ibañez 2021** | Undergraduate degree-based (Bachelor’s) course component | **Clinical & Triage:** Active threat response (RACE protocol); severe bleeding control (pressure, packing, tourniquet); airway protection and chest wound coverage; hypothermia prevention.  **Teamwork & Leadership:** Evacuation via safe routes; role coordination and triage under limited resources; clear communication under pressure. |
| **Evans 2018** | Undergraduate degree-based (Bachelor’s) course component | **Systems & Command:** Tabletop disaster decision-making with Incident Command roles; surge capacity and inpatient acuity/stability assessment; resource needs and disposition (discharge/transfer/cohorting).  **Teamwork & Leadership:** Role-based communication and teamwork; clinical judgment under constraints. |
| **Cicero 2017** | Stand-alone training | **Systems & Command:** Incident command system (ICS) concepts; operational coordination.  **Clinical & Triage:** Pediatric rapid triage assessment (mobility, airway, breathing, circulation, mental status); algorithm-based triage (JumpSTART/START/Smart) with accurate RED/YELLOW/GREEN/BLACK assignment; safety-critical error prevention for RED/YELLOW misclassification. |
| **Chiang 2020** | Stand-alone training | **Systems & Command:** Hazmat site control (hot/warm/cold zones, command setup); hazmat operations coordination.  **Clinical & Triage:** Patient triage in disaster/MCI context; patient assessment and immediate care within hazmat constraints; responder safety and PPE use; decontamination planning/execution and cross-contamination prevention; contaminated debris/waste management; safe transfer and transport. |
| **Noh 2020** | Stand-alone training | **Systems & Command:** Incident command competency and hospital disaster response structure; problem-solving, resource allocation, and decision-making during unfolding scenarios.  **Clinical & Triage:** Accurate triage in multi-victim contexts (virtual and tabletop); life-saving procedures (PPE, ABC management, contaminated wound care, splinting); surge capacity and patient flow management.  **Teamwork & Leadership:** Crisis management and coordination. |
| **Plaitano 2021** | Stand-alone training | **Systems & Command:** Incident command system (ICS) concepts; large-venue operations and navigation; LVEMS procedures and patient extrication in dense crowds.  **Clinical & Triage:** Clinical care and triage in mass gatherings; managing common event presentations and triage/transport vs. treat-and-release decisions.  **Teamwork & Leadership:** Effective collaboration with mentors, peers, medical command, and venue staff; equipment and documentation skills.  **Public Health & Preparedness:** Preparedness and confidence for large-venue EMS operations. |
| **Sarin 2017** | Education model proposal (Residency) | **Systems & Command:** Incident command system (ICS) concepts; volunteer management and coordination of spontaneous/organized volunteers.  **Clinical & Triage:** Patient triage in disaster/MCI context with mass-casualty mindset; decontamination procedures for hazardous exposures; pediatric/geriatric/special-needs triage and vulnerable population care.  **Public Health & Preparedness:** Health equity and cultural competence in disaster response; recognition of pre-existing health and social disparities amplified by disasters. |
| **Sandifer 2023** | Education model proposal (EM residency and fellowship) | **Systems & Command:** Disaster Medicine introduction; Incident Command Systems (ICS); Operations & Logistics; Communications.  **Clinical & Triage:** Patient triage in disaster/MCI context; EMS & Disaster Medicine; Disaster Medicine in the Field; Safety & Security; CBRNE protocols.  **Public Health & Preparedness:** Public Health & Disaster Medicine; Disaster Preparedness/Mitigation/Response/Resiliency; Hospital Disaster Preparedness.  **Psychosocial & Ethics:** Psychological Aspects; Ethical & Legal Issues; Social Dimensions of Disasters; Specialized contexts (Mass-Gathering Medicine, Austere/Wilderness/Conflict Medicine, WMD, Radiation, Burn, Blast); Technology & Disaster Medicine. |
| **Ripoll-Gallardo 2020** | Stand-alone training | **Systems & Command:** Disaster cycle/response principles; incident management systems (IMS) and mass-casualty triage; surge capacity; communication with teams, agencies, and media; leadership and decision-making; coordination and problem-solving.  **Clinical & Triage:** Mass-casualty operations and triage in austere/conflict settings; essential clinical and surgical care with limited resources (MSF-type field settings).  **Public Health & Preparedness:** Scarce resource management; core public health actions (rapid assessment, epidemiology basics, WASH, nutrition, disease surveillance). |
| **Sandifer 2024** | Education model proposal (EM residency and fellowship) | **Systems & Command:** Principles of disaster medicine; medical oversight of emergency management systems; disaster preparedness/resiliency and health care preparedness; operations and logistics; incident command oversight.  **Clinical & Triage:** Patient triage in disaster/MCI context; prehospital disaster medicine; CBRNE hazards.  **Public Health & Preparedness:** Public health and hospital readiness in disasters. |
| **Alhawatmeh 2025** | Stand-alone training | **Clinical & Triage:** Scene safety and hazard awareness; rapid START-based assessment (walking status, breathing, perfusion, mental status); accurate START triage categorization and prioritization; correct triage tag application and labeling; START triage knowledge (principles and application via MCQ).  **Teamwork & Leadership:** Calling and requesting additional help and resources promptly. |
| **Allen 2016** | Stand-alone training | **Systems & Command:** Incident command system (ICS) concepts; surge planning, patient flow to OR/ICU/evacuation, and operational coordination.  **Clinical & Triage:** MASCAL/trauma triage; combat casualty care essentials (TCCC, Evidence-Based CPGs); hemorrhage control and hypothermia prevention; austere resuscitation; airway/chest trauma; access/exposure; anesthesia/ventilation; point-of-care ultrasound; damage-control surgery in resource-limited environments.  **Teamwork & Leadership:** Team leadership, communication, defined roles, handoffs, conflict resolution under pressure. |
| **Altman 2016** | education model proposal | **Systems & Command:** Incident command system (ICS) concepts; disaster-cycle planning and response (preparedness, response, recovery/mitigation) tailored to older adults; emergency preparedness structures and role-based emergency management; practical drills for geriatric care environments (evacuation, stockpiling).  **Clinical & Triage:** Patient triage in disaster/MCI context; context-specific care delivery (hospital, long-term care, home/community, hospice, pharmacy); geriatric clinical needs (chronic/acute illness, meds, assistive devices).  **Psychosocial & Ethics:** Psychosocial support and mental health needs for older adults; ethical and legal considerations (decision-making, rights, resource allocation) for geriatric populations during crises. |
| **Anderson 2025** | Undergraduate degree-based (Bachelor’s) course component; optional for EMT's but compulsory for nurses | **Systems & Command:** Incident management and team coordination; clear decision-making, rapid response, and adaptation to changing situations.  **Clinical & Triage:** Patient triage in disaster/MCI context.  **Teamwork & Leadership:** Decisive leadership while staying calm; role assignment and task organization; team culture building, empowerment, support, motivation, and trust across nursing/EMT roles. |
| **Bahattab 2022** | Postgraduate degree program (EMDM) | **Systems & Command:** Disaster management including coordination, command-control, and system organization; surge capacity.  **Clinical & Triage:** Medical care across disaster contexts; patient triage in disaster/MCI context.  **Public Health & Preparedness:** Public health measures, surveillance, outbreak management; pandemic/epidemic response.  **Teamwork & Leadership:** Education and training capacity building. |
| **Genç 2025** | Stand-alone training | **Public Health & Preparedness:** Disaster literacy across the disaster cycle (mitigation/prevention, preparedness, response, recovery/rehabilitation) with skills in accessing information, understanding, decision-making, and implementation; applied personal/family preparedness behaviors (disaster mobile-app use, volunteering, family disaster plan development); Health Belief Model drivers (perceived susceptibility, severity, benefits, barriers, cues to action, self-efficacy).  **Clinical & Triage:** Patient triage in disaster/MCI context. |
| **Sarin 2019** | education model proposal (for em residency) | **Systems & Command:** Disaster/MCI basics; all-hazards approach; hazard vulnerability analysis (HVA); NIMS/ICS/NRF; recognition and notification; hospital readiness and surge; preparedness/mitigation/response/recovery; evacuation and drills; continuity planning; shelter and nutrition; volunteer coordination; mass gatherings; austere/international settings.  **Clinical & Triage:** Disaster triage; trauma/blast/burn/collapse MCIs; terrorism/tactical EM; CBRNE (chemical/biological/radiation) decontamination and PPE; isolation/quarantine; SNS.  **Teamwork & Leadership:** Communication, safety/security, tracking, and cross-team coordination.  **Psychosocial & Ethics:** Medicolegal issues, ethical allocation, psychological support, vulnerable populations. |
| **Schilly 2024** | Elective module within an undergraduate degree program | **Systems & Command:** Incident management concepts and integration of clinician roles into local/national response systems; surge capacity concepts and all-hazards preparedness planning.  **Clinical & Triage:** Field/mass-casualty triage principles; scenario practice, tabletop drills, and culminating drill; exposure/CBRNE agent recognition; PPE and decontamination practice.  **Psychosocial & Ethics:** Psychological first aid concepts; personal and family preparedness planning. |
