# Supplementary material
Source: Research Square preprint supplement (doi:10.21203/rs.3.rs-9230758/v1)
Supplement: Supplementary file 3 [file 91c9c4dd22cd1ac24d871170.docx]

# Appendix 2. Crosswalk Between Kirkpatrick's Evaluation Model and Moore's Expanded Outcomes Framework

| Kirkpatrick Level | Moore Level | Moore Operational Definition | Mapping Rationale |
| --- | --- | --- | --- |
| Level 1 Reaction | **L1 — Participation** | Attendance, enrolment, or completion of training activity. | Direct equivalent: both capture whether learners engaged with the programme. L1 records participation as a precondition for subsequent outcomes. |
| **L2 — Satisfaction** | Learner satisfaction, perceived relevance, engagement, and confidence. | Moore separates satisfaction from mere attendance. Kirkpatrick Level 1 conflates both; Moore's L2 isolates affective response as a distinct construct. |
| Level 2 Learning | **L3a — Declarative Knowledge** | Factual recall and recognition (e.g., MCQ, true/false tests). | Moore distinguishes knowing-that from knowing-how. Kirkpatrick Level 2 treats all learning as one category; Moore's L3a captures factual retention only. |
| **L3b — Procedural Knowledge** | Applied understanding, reasoning, and self-reported skill or attitude gains (e.g., validated preparedness/competency scales). | Moore's L3b captures the application dimension that Kirkpatrick Level 2 does not differentiate. This distinction is critical: a learner may recall triage criteria (L3a) yet fail to apply them under pressure (L3b). |
| Level 3 Behaviour | **L4 — Competence** | Demonstrated ability in controlled or simulated settings (e.g., triage scoring, simulation checklists, OSCE, global rating scales). | Moore adds a simulated-competence layer absent from Kirkpatrick. K-Level 3 measures real-world behaviour change; Moore's L4 captures demonstrated ability before real-world transfer, recognising that simulation performance is a necessary but insufficient precursor. |
| Level 3 Behaviour (continued) | **L5 — Performance** | Behaviour change in real clinical practice or field deployment (e.g., supervisor evaluations, post-deployment feedback). | Moore's L5 is the true equivalent of Kirkpatrick Level 3: observed behaviour change in authentic practice. The distinction from L4 is setting — simulated (L4) vs. real-world (L5). |
| Level 4 Results | **L6 — Patient Health** | Measurable patient-level health outcomes attributable to the educational intervention. | Moore disaggregates Kirkpatrick's broad 'Results' into patient-level (L6) and community/system-level (L7) outcomes. No study in this review achieved L6. |
| **L7 — Community Health** | Population-level or system-level health outcomes. | Represents the furthest downstream impact. Kirkpatrick Level 4 does not distinguish patient from population outcomes. No study in this review achieved L7. |

Kirkpatrick DL, Kirkpatrick JD. Evaluating Training Programs: The Four Levels. 3rd ed. San Francisco: Berrett-Koehler Publishers; 2006.

Moore DE, Green JS, Gallis HA. Achieving desired results and improved outcomes: Integrating planning and assessment throughout learning activities. J Contin Educ Health Prof. 2009;29(1):1–15.
